# Supplementary material
Source: PubMed Central journal article supplement (PMC4067006)

## Supporting Information

### ***N*-(3,3a,4,4a,5,5a,6,6a-Octahydro-1,3-dioxo-4,6-ethenocycloprop[*f*]isoindol-2-(1*H*)-yl)carboxamides: Identification of Novel Orthopoxvirus Egress Inhibitors.**

Thomas R. Bailey,\* Susan R. Rippin, Elizabeth Opsitnick, Christopher J. Burns, Daniel C. Pevear, Marc S. Collett, Gerry Rhodes, Sanjeev Tohan, John W. Huggins, Robert O. Baker, Earl Kern, Kathy Keith, Dongcheng Dai, Guang Yang, Dennis Hruby, and Robert Jordan.

General experimental procedure and characterization of final targets. X-ray crystallography data for compound **13**.

**General Methods.** Melting points were obtained using a MelTemp apparatus, and are uncorrected. Proton NMR spectra were obtained on a Bruker AM 500 MHz spectrometer or a Mercury 300 spectrometer. Elemental analyses for carbon, hydrogen, and nitrogen were performed by Robertson Microlit Laboratories. Analytical thin-layer chromatography (TLC) was conducted on precoated silica gel 60 plates (Whatman). Chromatography was conducted on silica gel 60 under low pressure.

**General Procedure for synthesis of compounds 2-14, 16-18. *N*-(3,3a,4,4a,5,5a,6,6a-octahydro-1,3-dioxo-4,6-ethenocycloprop[*f*]isoindol-2(1*H*)-yl)-4-(trifluoromethyl)benzamide (14).** A mixture of 2.00 g (9.8 mmol) of 4-(trifluoromethyl)benzoic acid hydrazide, 1.86 g (9.8 mmol) of 4,4a,5,5a,6,6a-hexahydro-4,6-etheno-1*H*-cycloprop[*f*]isobenzofuran-1,3(3a*H*)-dione, and one drop of diisopropylethylamine in 40 mL of absolute ethanol was refluxed for 4.5 h. Upon cooling to rt, 4 mL of water was added, and the product began to crystallize. The suspension was cooled in an ice bath, and the precipitate collected by filtration. The crystalline solid was air-dried affording 3.20 g (87%) of the product as a white solid; Mp 194-195 °C. <sup>1</sup>H NMR, (300 MHz, d<sup>6</sup>-DMSO) δ 11.20, 11.09 (2 brs from rotamers, 1H), 8.06 (d, *J* = 7.8 Hz, 2H), 7.90 (d, *J* = 7.8 Hz, 2H), 5.78 (m, 2H), 3.26 (m, 4H), 1.15 (m, 2H), 0.24 (dd, *J* = 7.2, 12.9 Hz, 1H), 0.04 (m, 1H). Anal. calcd. for C<sub>19</sub>H<sub>15</sub>F<sub>3</sub>N<sub>2</sub>O<sub>3</sub>•0.25H<sub>2</sub>O: %C, 59.92; %H, 4.10; %F, 14.97; %N, 7.36; %O, 13.65. Found: %C, 59.97; %H, 4.02; %F, 14.94; %N, 7.36; %O, 13.71.

***N*-(Octahydro-1,3-dioxo-4,6-ethanocycloprop[*f*]isoindol-2(1*H*)-yl)-4-(trifluoromethyl)benzamide (15).** a) To a solution of 2.50 g (13.1 mmol) of 4,4a,5,5a,6,6a-hexahydro-4,6-etheno-1*H*-cycloprop[*f*]isobenzofuran-1,3(3a*H*)-dione (**1a**) in 25 mL of absolute ethanol in a Paar hydrogenation bottle was added 250 mg (10% by weight) of 10% Pd/C. The mixture was shaken in a Paar hydrogenation apparatus under 50 psi of H<sub>2</sub> for 3 h. The reaction was filtered through celite, and concentrated in vacuo to afford 2.43 g (96%) of the reduced product as a white solid. <sup>1</sup>H NMR (500 MHz, d<sup>6</sup>-DMSO) δ 3.36 (m, 2H), 2.38 (m, 2H), 1.26 (m, 2H), 1.06 (m, 4H), 0.84 (m, 1H), 0.56 (m, 1H).  
b) A solution of 4,4a,5,5a,6,6a-hexahydro-4,6-ethano-1*H*-cycloprop[*f*]isobenzofuran-1,3(3a*H*)-dione (**1b**; 0.345 g, 1.8 mmol) and 4-(trifluoromethyl)benzoic acid hydrazide (0.366 g, 1.8

mmol) in 11 mL of absolute ethanol was refluxed for 4h. Upon cooling, the reaction was concentrated under vacuum, and the resultant oil subjected to column chromatography (silica gel 60; 1:1 EtOAc/hexanes) affording 0.381g (56% yield) of the product as a white solid. <sup>1</sup>H NMR (500 MHz, d<sup>6</sup>-DMSO) δ 11.18 (br.s., 1H), 8.05 (d, *J*= 8.5 Hz, 2H), 7.95 (d, *J*= 8.5 Hz, 2H), 3.21 (m, 2H), 2.40 (m, 2H), 1.46 (d, *J*= 8.5 Hz, 2H), 1.10 (m, 4H), 0.82 (m, 1H), 0.53 (m, 1H). Anal. calcd. for C<sub>19</sub>H<sub>17</sub>F<sub>3</sub>N<sub>2</sub>O<sub>3</sub>: %C, 60.32; %H, 4.53; %N, 7.40. Found: %C, 60.27; %H, 4.37; %N, 7.37.

**N-(3,3a,4,4a,5,5a,6,6a-octahydro-1,3-dioxo-4,6-ethenocycloprop[f]isoindol-2(1H)-yl)-4-nitrobenzamide (2).** 5% yield. <sup>1</sup>H NMR (500 MHz, d<sup>6</sup>-DMSO) δ 10.49, 10.23 (2br.s, 1H), 8.38 (m, 2H), 8.12 (m, 2H), 5.80 (m, 2H), 3.30 (m, 4H), 2.90 (s, 6H), 1.18 (m, 2H), 0.27 (m, 1H), 0.08 (m, 1H). Anal. calcd. for C<sub>18</sub>H<sub>15</sub>N<sub>3</sub>O<sub>5</sub>: %C, 61.19; %H, 4.28; %N, 11.89. Found %C, 60.97; %H, 4.46; %N, 11.86.

**N-(3,3a,4,4a,5,5a,6,6a-octahydro-1,3-dioxo-4,6-ethenocycloprop[f]isoindol-2(1H)-yl)-4-dimethylaminobenzamide (3).** 56% yield. <sup>1</sup>H NMR (500 MHz, d<sup>6</sup>-DMSO) δ 11.14, 10.88 (2br.s, 1H), 7.85 (d, *J*= 7.8 Hz, 2H), 7.55 (d, *J*= 7.8 Hz, 2H), 5.74 (m, 2H), 3.28 (m, 4H), 3.16 (d, *J*= 10 Hz, 6H), 1.10 (m, 2H), 0.20 (m, 1H), 0.02 (m, 1H). Anal. calcd. for C<sub>20</sub>H<sub>21</sub>N<sub>3</sub>O<sub>3</sub>: %C, 68.36; %H, 6.02; %N, 11.96. Found: %C, 68.18; %H, 6.01; %N, 11.99.

**N-(3,3a,4,4a,5,5a,6,6a-octahydro-1,3-dioxo-4,6-ethenocycloprop[f]isoindol-2(1H)-yl)-4-aminobenzamide (4).** 41% yield. <sup>1</sup>H NMR (500 MHz, d<sup>6</sup>-DMSO) δ 11.49 (br. s, 1H), 7.95 (d, *J*= 7.8 Hz, 2H), 6.56 (d, *J*= 7.8 Hz, 2H), 5.84 (m, 2H), 5.78 (m, 2H), 3.28 (m, 4H), 1.19 (m, 2H), 0.27 (m, 1H), 0.08 (m, 1H). Anal. calcd. for C<sub>18</sub>H<sub>15</sub>N<sub>3</sub>O<sub>3</sub>: %C, 66.86; %H, 5.30; %N, 13.00. Found: %C, 66.86; %H, 5.42; %N, 11.80.

**N-(3,3a,4,4a,5,5a,6,6a-octahydro-1,3-dioxo-4,6-ethenocycloprop[f]isoindol-2(1H)-yl)-2-pyridinecarboxamide (5).** 67% yield. <sup>1</sup>H NMR (500 MHz, d<sup>6</sup>-DMSO) δ 11.11 (br. s, 1H), 8.70 (d, 4.5 Hz, 1H), 8.04 (m, 4H), 7.69 (m, 2H), 5.76 (m, 2H), 3.27 (m, 4H), 1.17 (m, 2H), 0.26(m, 1H), 0.08 (m, 1H). Anal. calcd. for C<sub>17</sub>H<sub>15</sub>N<sub>3</sub>O<sub>3</sub>: %C, 66.01; %H, 4.89; %N, 13.58. Found: %C, 65.91; %H, 4.89; %N, 13.58. Found: %C, 65.91; %H, 5.15; %N, 13.57.

**N-(3,3a,4,4a,5,5a,6,6a-octahydro-1,3-dioxo-4,6-ethenocycloprop[f]isoindol-2(1H)-yl)-3-pyridinecarboxamide (6).** 62% yield. <sup>1</sup>H NMR (500 MHz, d<sup>6</sup>-DMSO) δ 11.45 (br. s, 1H), 9.05 (m, 1H), 8.81 (dd, *J*= 1.0, 4.5 Hz, 1H), 8.24 (m, 1H), 7.59 (dd, *J*= 5.0, 8.0 Hz, 1H), 5.79 (m, 2H), 3.36 (m, 4H), 1.19 (m, 2H), 0.27 (m, 1H), 0.07 (m, 1H). Anal. calcd. for C<sub>17</sub>H<sub>15</sub>N<sub>3</sub>O<sub>3</sub>: %C, 66.01; %H, 4.89; %N, 13.58. Found: %C, 65.91; %H, 4.89; %N, 13.58. Found: %C, 66.03; %H, 4.73; %N, 13.46.

**N-(3,3a,4,4a,5,5a,6,6a-octahydro-1,3-dioxo-4,6-ethenocycloprop[f]isoindol-2(1H)-yl)-4-pyridinecarboxamide (7).** 67% yield. <sup>1</sup>H NMR (500 MHz, d<sup>6</sup>-DMSO) δ 11.40 (v.br. s, 1H), 8.81 (dd, *J*= 1.5, 4.5 Hz, 2H), 7.79 (m, 2H), 5.81 (m, 2H), 3.34 (m, 4H), 1.17 (m, 2H), 0.27 (m, 1H), 0.07 (m, 1H). Anal. calcd. for C<sub>17</sub>H<sub>15</sub>N<sub>3</sub>O<sub>3</sub>: %C, 66.01; %H, 4.89; %N, 13.58. Found: %C, 65.91; %H, 4.89; %N, 13.58. Found: %C, 65.94; %H, 4.72; %N, 13.63.

**N-(3,3a,4,4a,5,5a,6,6a-octahydro-1,3-dioxo-4,6-ethenocycloprop[f]isoindol-2(1H)-yl)-2-chlorobenzamide (8).** 67% yield. <sup>1</sup>H NMR (500 MHz, d<sup>6</sup>-DMSO) δ 10.78, 10.52 (2br.s., 1H), 7.76 (m, 4H), 5.79 (m, 2H), 3.30 (m, 4H), 1.19 (m, 2H), 0.27 (m, 1H), 0.07 (m, 1H). Anal. calcd. for C<sub>18</sub>H<sub>15</sub>ClN<sub>2</sub>O<sub>3</sub>: %C, 63.07; %H, 4.41; %N, 8.17. Found: %C, 63.25; %H, .41; %N, 7.92.

**N-(3,3a,4,4a,5,5a,6,6a-octahydro-1,3-dioxo-4,6-ethenocycloprop[f]isoindol-2(1H)-yl)-3-chlorobenzamide (9).** 48% yield. <sup>1</sup>H NMR (500 MHz, d<sup>6</sup>-DMSO) δ 11.14, 10.88 (2br.s., 1H), 7.88 (m, 1H), 7.75 (m, 1H), 7.67 (m, 1H), 7.55 (m, 1H), 5.72 (m, 2H), 3.30 (m, 4H), 1.19 (m, 2H), 0.27 (m, 1H), 0.07 (m, 1H). Anal. calcd. for C<sub>18</sub>H<sub>15</sub>ClN<sub>2</sub>O<sub>3</sub>: %C, 63.07; %H, 4.41; %N, 8.17; %Cl, 10.34. Found: %C, 63.06; %H, 4.32; %N, 7.90; %Cl, 10.61.

**N-(3,3a,4,4a,5,5a,6,6a-octahydro-1,3-dioxo-4,6-ethenocycloprop[f]isoindol-2(1H)-yl)-4-chlorobenzamide (10).** 49% yield. <sup>1</sup>H NMR (500 MHz, d<sup>6</sup>-DMSO) δ 11.14, 10.88 (2 br.s., 1H), 7.85 (d, *J* = 8.0 Hz, 2H), 7.55 (d, *J* = 8.0 Hz, 2H), 5.72 (m, 2H), 3.30 (m, 4H), 1.19 (m, 2H), 0.27 (m, 1H), 0.07 (m, 1H). Anal. calcd. for C<sub>18</sub>H<sub>15</sub>ClN<sub>2</sub>O<sub>3</sub>: %C, 63.07; %H, 4.41; %N, 8.17; %Cl, 10.34. Found: %C, 63.11; %H, 4.61; %N, 7.97; %Cl, 10.56.

**N-(3,3a,4,4a,5,5a,6,6a-octahydro-1,3-dioxo-4,6-ethenocycloprop[f]isoindol-2(1H)-yl)-2-bromobenzamide (11).** 58% yield. <sup>1</sup>H NMR (500 MHz, d<sup>6</sup>-DMSO) δ 11.14, 10.88 (2br.s., 1H), 7.85 (d, *J* = 8.0 Hz, 1H), 7.55 (m, 3H), 5.72 (m, 2H), 3.30 (m, 4H), 1.19 (m, 2H), 0.27 (m, 1H), 0.07 (m, 1H). Anal. calcd. for C<sub>18</sub>H<sub>15</sub>BrN<sub>2</sub>O<sub>3</sub>: %C, 55.83; %H, 3.90; %N, 7.23, %Br, 20.63. Found: %C, 56.13; %H, 3.83; %N, 6.91; %Br, 20.47.

**N-(3,3a,4,4a,5,5a,6,6a-octahydro-1,3-dioxo-4,6-ethenocycloprop[f]isoindol-2(1H)-yl)-3-bromobenzamide (12).** 56% yield. <sup>1</sup>H NMR (500 MHz, d<sup>6</sup>-DMSO) δ 11.14, 10.88 (2br.s., 1H), 8.00 (m, 1H), 7.85 (m, 2H), 7.55 (m, 1H), 5.72 (m, 2H), 3.30 (m, 4H), 1.19 (m, 2H), 0.27 (m, 1H), 0.07 (m, 1H). Anal. calcd. for C<sub>18</sub>H<sub>15</sub>BrN<sub>2</sub>O<sub>3</sub>: %C, 55.83; %H, 3.90; %N, 7.23, %Br, 20.63. Found: %C, 55.94; %H, 3.88; %N, 7.02; %Br, 20.29.

**N-(3,3a,4,4a,5,5a,6,6a-octahydro-1,3-dioxo-4,6-ethenocycloprop[f]isoindol-2(1H)-yl)-4-bromobenzamide (13).** 69% yield. <sup>1</sup>H NMR (500 MHz, d<sup>6</sup>-DMSO) δ 11.19 (br.s., 1H), 7.83 (m, 2H), 7.76 (d, *J* = 8.5 Hz, 2H), 5.78 (m, 2H), 3.26 (m, 4H), 1.15 (m, 2H), 0.28 (m, 1H), 0.07 (m, 1H). Anal. calcd. for C<sub>18</sub>H<sub>15</sub>BrN<sub>2</sub>O<sub>3</sub>: %C, 55.83; %H, 3.90; %N, 7.23, %Br, 20.63. Found: %C, 55.99; %H, 3.88; %N, 7.16; %Br, 20.58.

**N-(3,3a,4,4a,5,5a,6,6a-octahydro-1,3-dioxo-4,6-ethenocycloprop[f]isoindol-2(1H)-yl)-4-methoxybenzamide (16).** 71% yield. <sup>1</sup>H NMR (500 MHz, d<sup>6</sup>-DMSO) δ 10.90, 10.65 (2br. s., 1H), 7.81 (m, 2H), 7.06 (m, 2H), 5.80 (m, 2H), 3.84 (s, 3H), 3.28 (m, 4H), 1.18 (m, 2H), 0.27 (m, 1H), 0.07 (m, 1H). Anal. calcd. for C<sub>19</sub>H<sub>18</sub>N<sub>2</sub>O<sub>4</sub>: %C, 67.45; %H, 5.36; %N, 8.28. Found: %C, 67.37; %H, 5.50; %N, 8.11.

**N-(3,3a,4,4a,5,5a,6,6a-octahydro-1,3-dioxo-4,6-ethenocycloprop[f]isoindol-2(1H)-yl)-1-methyl-1H-pyrrole-2-carboxamide (17).** 50% yield. <sup>1</sup>H NMR (500 MHz, d<sup>6</sup>-DMSO) δ 10.48, 10.20 (2 br.s., 1H), 7.02 (m, 2H), 6.09 (d, *J* = 6.0 Hz, 1H), 5.79 (m, 2H), 3.81 (s, 3H), 3.29 (m, 4H), 1.18 (m, 2H), 0.27 (m, 1H), 0.07 (m, 1H). Anal. calcd. for C<sub>17</sub>H<sub>17</sub>N<sub>3</sub>O<sub>3</sub>: %C, 65.58; %H, 5.50; %N, 13.50. Found: %C, 65.47; %H, 5.50; %N, 13.48.

**N-(3,3a,4,4a,5,5a,6,6a-octahydro-1,3-dioxo-4,6-ethenocycloprop[f]isoindol-2(1H)-yl)-5-methyl-1H-pyrazole-3-carboxamide(18).** 62% yield. <sup>1</sup>H NMR (500 MHz, d<sup>6</sup>-DMSO) δ 13.12 (br. s., 1H), 10.53 (v.br.s., 1H), 6.44 (s, 1H), 5.77 (m, 2H), 3.27 (m, 2H), 3.12 (m, 2H), 2.32 (s, 3H), 1.18 (m, 2H), 0.26 (m, 1H), 0.07 (m, 1H). Anal. calcd. for C<sub>16</sub>H<sub>16</sub>N<sub>4</sub>O<sub>3</sub>: %C, 61.53; %H, 5.16; %N, 17.94. Found: %C, 61.58; %H, 5.23; %N, 18.05.

### X-ray crystallography data for compound 13.

#### Data collection

A crystal (approximate dimensions 0.41 x 0.29 x 0.23 mm<sup>3</sup>) was placed onto the tip of a 0.1 mm diameter glass capillary and mounted on a Bruker SMART system for a data collection at 173(2) K. A preliminary set of cell constants was calculated from reflections harvested from three sets of 20 frames. These initial sets of frames were oriented such that orthogonal wedges of reciprocal space were surveyed. This produced initial orientation matrices determined from 114 reflections. The data collection was carried out using MoK $\alpha$  radiation (graphite monochromator) with a frame time of 15 seconds and a detector distance of 4.9 cm. A randomly oriented region of reciprocal space was surveyed to the extent of 2.0 hemispheres and to a resolution of 0.77 Å. Three major sections of frames were collected with 0.30° steps in  $\omega$  at 3 different  $\phi$  settings and a detector position of -28° in 2 $\theta$ . The intensity data were corrected for absorption and decay (SADABS).<sup>1</sup> Final cell constants were calculated from 3908 strong reflections from the actual data collection after integration (SAINT 6.35A, 2002).<sup>2</sup> Please refer to Table 1 for additional crystal and refinement information.

#### Structure solution and refinement

The structure was solved and refined using SHELXL-V6.12.<sup>3</sup> The space group C2/c was determined based on systematic absences and intensity statistics. A direct-methods solution was calculated which provided most non-hydrogen atoms from the E-map. Full-matrix least squares / difference Fourier cycles were performed which located the remaining non-hydrogen atoms. All non-hydrogen atoms were refined with anisotropic displacement parameters unless stated otherwise. All hydrogen atoms were placed in ideal positions and refined as riding atoms with relative isotropic displacement parameters. The final full matrix least squares refinement converged to R1 = 0.0381 and wR2 = 0.0967 (F<sup>2</sup>, all data).

#### Structure description

The structure was found to be enantiomeric and a monohydrate. That are three hydrogen bonds

listed in Table 7.

Data collection and structure solution were conducted at the X-Ray Crystallographic Laboratory, 160 Kolthoff Hall, Department of Chemistry, University of Minnesota. All calculations were performed using SGI INDY R4400-SC or Pentium computers using the current SHELXTL suite of programs.

- 
- 1 An empirical correction for absorption anisotropy, R. Blessing, *Acta Cryst.* A51, 33 - 38 (1995).
  - 2 SAINT V6.35A, Bruker Analytical X-Ray Systems, Madison, WI.
  - 3 SHELXTL-Plus V6.12, Bruker Analytical X-Ray Systems, Madison, WI.

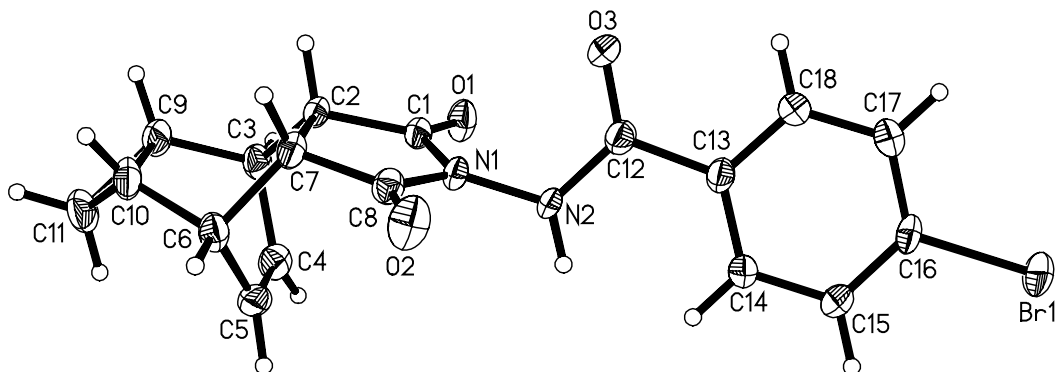

Table 1. Crystal data and structure refinement for compound **13**.

|                                   |                                                                  |                  |
|-----------------------------------|------------------------------------------------------------------|------------------|
| Identification code               | compound <b>13</b>                                               |                  |
| Empirical formula                 | C <sub>18</sub> H <sub>17</sub> Br N <sub>2</sub> O <sub>4</sub> |                  |
| Formula weight                    | 405.25                                                           |                  |
| Temperature                       | 173(2) K                                                         |                  |
| Wavelength                        | 0.71073 Å                                                        |                  |
| Crystal system                    | Monoclinic                                                       |                  |
| Space group                       | C2/c                                                             |                  |
| Unit cell dimensions              | a = 26.943(3) Å                                                  | α = 90°.         |
|                                   | b = 10.7772(13) Å                                                | β = 109.687(2)°. |
|                                   | c = 12.4623(15) Å                                                | γ = 90°.         |
| Volume                            | 3407.2(7) Å <sup>3</sup>                                         |                  |
| Z                                 | 8                                                                |                  |
| Density (calculated)              | 1.580 Mg/m <sup>3</sup>                                          |                  |
| Absorption coefficient            | 2.439 mm <sup>-1</sup>                                           |                  |
| F(000)                            | 1648                                                             |                  |
| Crystal habit and color           | Colorless, Block                                                 |                  |
| Crystal size                      | 0.41 x 0.29 x 0.23 mm <sup>3</sup>                               |                  |
| Theta range for data collection   | 1.61 to 27.52°.                                                  |                  |
| Index ranges                      | -34 ≤ h ≤ 32, 0 ≤ k ≤ 14, 0 ≤ l ≤ 16                             |                  |
| Reflections collected             | 20243                                                            |                  |
| Independent reflections           | 3924 [R(int) = 0.0552]                                           |                  |
| Observed Reflections              | 3046                                                             |                  |
| Completeness to theta = 27.52°    | 99.9 %                                                           |                  |
| Absorption correction             | Multi-scan                                                       |                  |
| Max. and min. transmission        | 0.6039 and 0.4346                                                |                  |
| Refinement method                 | Full-matrix least-squares on F <sup>2</sup>                      |                  |
| Data / restraints / parameters    | 3924 / 1 / 232                                                   |                  |
| Goodness-of-fit on F <sup>2</sup> | 1.057                                                            |                  |
| Final R indices [I > 2σ(I)]       | R1 = 0.0381, wR2 = 0.0874                                        |                  |
| R indices (all data)              | R1 = 0.0569, wR2 = 0.0967                                        |                  |
| Largest diff. peak and hole       | 0.951 and -0.770 e.Å <sup>-3</sup>                               |                  |

Table 2. Atomic coordinates ( $\times 10^4$ ) and equivalent isotropic displacement parameters ( $\text{\AA}^2 \times 10^3$ ) for compound **13**.  $U_{\text{eq}}$  is defined as one third of the trace of the orthogonalized  $U_{ij}$  tensor.

|     | x        | y       | z       | U(eq) |
|-----|----------|---------|---------|-------|
| N1  | 7863(1)  | 4721(2) | 1700(2) | 20(1) |
| C1  | 7514(1)  | 3781(2) | 1189(2) | 21(1) |
| O1  | 7574(1)  | 2711(2) | 1502(2) | 30(1) |
| C2  | 7071(1)  | 4341(2) | 224(2)  | 21(1) |
| C3  | 6526(1)  | 4109(2) | 374(2)  | 24(1) |
| C4  | 6557(1)  | 4696(3) | 1491(2) | 26(1) |
| C5  | 6666(1)  | 5900(3) | 1565(2) | 26(1) |
| C6  | 6733(1)  | 6456(2) | 518(2)  | 26(1) |
| C7  | 7191(1)  | 5747(2) | 282(2)  | 23(1) |
| C8  | 7715(1)  | 5902(2) | 1218(2) | 22(1) |
| O2  | 7976(1)  | 6818(2) | 1546(2) | 36(1) |
| C9  | 6137(1)  | 4801(3) | -633(2) | 31(1) |
| C10 | 6253(1)  | 6175(3) | -539(2) | 33(1) |
| C11 | 5742(1)  | 5698(3) | -467(3) | 41(1) |
| N2  | 8309(1)  | 4514(2) | 2632(2) | 21(1) |
| C12 | 8728(1)  | 3944(2) | 2484(2) | 24(1) |
| O3  | 8731(1)  | 3617(2) | 1541(2) | 37(1) |
| C13 | 9186(1)  | 3700(2) | 3544(2) | 23(1) |
| C14 | 9213(1)  | 4095(3) | 4617(2) | 29(1) |
| C15 | 9653(1)  | 3853(3) | 5557(2) | 29(1) |
| C16 | 10065(1) | 3211(2) | 5416(2) | 25(1) |
| Br1 | 10674(1) | 2896(1) | 6696(1) | 39(1) |
| C17 | 10045(1) | 2776(3) | 4364(3) | 43(1) |
| C18 | 9604(1)  | 3033(3) | 3431(2) | 40(1) |
| O4  | 6905(1)  | 694(2)  | 631(2)  | 29(1) |

Table 3. Bond lengths [ $\text{\AA}$ ] and angles [ $^\circ$ ] for compound **13**

|           |            |           |          |
|-----------|------------|-----------|----------|
| N1-N2     | 1.379(3)   | C9-H9A    | 1.0000   |
| N1-C1     | 1.383(3)   | C10-C11   | 1.501(4) |
| N1-C8     | 1.406(3)   | C10-H10A  | 1.0000   |
| C1-O1     | 1.210(3)   | C11-H11A  | 0.9900   |
| C1-C2     | 1.506(3)   | C11-H11B  | 0.9900   |
| C2-C7     | 1.546(4)   | N2-C12    | 1.352(3) |
| C2-C3     | 1.559(4)   | N2-H2B    | 0.8800   |
| C2-H2A    | 1.0000     | C12-O3    | 1.230(3) |
| C3-C4     | 1.506(4)   | C12-C13   | 1.496(3) |
| C3-C9     | 1.531(4)   | C13-C18   | 1.382(4) |
| C3-H3A    | 1.0000     | C13-C14   | 1.382(4) |
| C4-C5     | 1.327(4)   | C14-C15   | 1.383(3) |
| C4-H4A    | 0.9500     | C14-H14A  | 0.9500   |
| C5-C6     | 1.501(4)   | C15-C16   | 1.367(4) |
| C5-H5A    | 0.9500     | C15-H15A  | 0.9500   |
| C6-C10    | 1.534(4)   | C16-C17   | 1.376(4) |
| C6-C7     | 1.561(4)   | C16-Br1   | 1.895(2) |
| C6-H6A    | 1.0000     | C17-C18   | 1.383(4) |
| C7-C8     | 1.509(3)   | C17-H17A  | 0.9500   |
| C7-H7A    | 1.0000     | C18-H18A  | 0.9500   |
| C8-O2     | 1.201(3)   | O4-H4B    | 0.80(2)  |
| C9-C11    | 1.504(4)   | O4-H4C    | 0.80(2)  |
| C9-C10    | 1.510(4)   |           |          |
|           |            |           |          |
| N2-N1-C1  | 122.2(2)   | C7-C2-H2A | 110.1    |
| N2-N1-C8  | 123.2(2)   | C3-C2-H2A | 110.1    |
| C1-N1-C8  | 114.5(2)   | C4-C3-C9  | 111.2(2) |
| O1-C1-N1  | 123.6(2)   | C4-C3-C2  | 106.4(2) |
| O1-C1-C2  | 128.5(2)   | C9-C3-C2  | 103.7(2) |
| N1-C1-C2  | 107.9(2)   | C4-C3-H3A | 111.7    |
| C1-C2-C7  | 104.97(19) | C9-C3-H3A | 111.7    |
| C1-C2-C3  | 111.4(2)   | C2-C3-H3A | 111.7    |
| C7-C2-C3  | 110.0(2)   | C5-C4-C3  | 114.6(2) |
| C1-C2-H2A | 110.1      | C5-C4-H4A | 122.7    |



|              |           |               |           |
|--------------|-----------|---------------|-----------|
| C3-C4-H4A    | 122.7     | C10-C11-C9    | 60.31(19) |
| C4-C5-C6     | 114.8(2)  | C10-C11-H11A  | 117.7     |
| C4-C5-H5A    | 122.6     | C9-C11-H11A   | 117.7     |
| C6-C5-H5A    | 122.6     | C10-C11-H11B  | 117.7     |
| C5-C6-C10    | 110.7(2)  | C9-C11-H11B   | 117.7     |
| C5-C6-C7     | 107.5(2)  | H11A-C11-H11B | 114.9     |
| C10-C6-C7    | 103.5(2)  | C12-N2-N1     | 119.3(2)  |
| C5-C6-H6A    | 111.6     | C12-N2-H2B    | 120.3     |
| C10-C6-H6A   | 111.6     | N1-N2-H2B     | 120.3     |
| C7-C6-H6A    | 111.6     | O3-C12-N2     | 122.3(2)  |
| C8-C7-C2     | 105.7(2)  | O3-C12-C13    | 121.7(2)  |
| C8-C7-C6     | 113.2(2)  | N2-C12-C13    | 116.0(2)  |
| C2-C7-C6     | 108.9(2)  | C18-C13-C14   | 118.7(2)  |
| C8-C7-H7A    | 109.6     | C18-C13-C12   | 117.4(2)  |
| C2-C7-H7A    | 109.6     | C14-C13-C12   | 124.0(2)  |
| C6-C7-H7A    | 109.6     | C13-C14-C15   | 120.8(2)  |
| O2-C8-N1     | 123.4(2)  | C13-C14-H14A  | 119.6     |
| O2-C8-C7     | 130.0(2)  | C15-C14-H14A  | 119.6     |
| N1-C8-C7     | 106.7(2)  | C16-C15-C14   | 119.2(2)  |
| C11-C9-C10   | 59.7(2)   | C16-C15-H15A  | 120.4     |
| C11-C9-C3    | 121.4(3)  | C14-C15-H15A  | 120.4     |
| C10-C9-C3    | 110.3(2)  | C15-C16-C17   | 121.5(2)  |
| C11-C9-H9A   | 117.2     | C15-C16-Br1   | 119.5(2)  |
| C10-C9-H9A   | 117.2     | C17-C16-Br1   | 119.0(2)  |
| C3-C9-H9A    | 117.2     | C16-C17-C18   | 118.6(3)  |
| C11-C10-C9   | 59.95(19) | C16-C17-H17A  | 120.7     |
| C11-C10-C6   | 122.8(3)  | C18-C17-H17A  | 120.7     |
| C9-C10-C6    | 110.7(2)  | C13-C18-C17   | 121.2(3)  |
| C11-C10-H10A | 116.6     | C13-C18-H18A  | 119.4     |
| C9-C10-H10A  | 116.6     | C17-C18-H18A  | 119.4     |
| C6-C10-H10A  | 116.6     | H4B-O4-H4C    | 104(3)    |

---

Symmetry transformations used to generate equivalent atoms:

Table 4. Anisotropic displacement parameters ( $\text{\AA}^2 \times 10^3$ ) for compound **13**. The anisotropic displacement factor exponent takes the form:  $-2\pi^2 [ h^2 a^{*2} U_{11} + \dots + 2 h k a^* b^* U_{12} ]$

|     | $U_{11}$ | $U_{22}$ | $U_{33}$ | $U_{23}$ | $U_{13}$ | $U_{12}$ |
|-----|----------|----------|----------|----------|----------|----------|
| N1  | 15(1)    | 23(1)    | 17(1)    | 0(1)     | 0(1)     | 0(1)     |
| C1  | 17(1)    | 23(1)    | 20(1)    | -2(1)    | 3(1)     | 1(1)     |
| O1  | 26(1)    | 22(1)    | 32(1)    | 3(1)     | -2(1)    | 2(1)     |
| C2  | 18(1)    | 23(1)    | 17(1)    | -1(1)    | 0(1)     | 2(1)     |
| C3  | 16(1)    | 24(1)    | 28(1)    | -2(1)    | 3(1)     | -1(1)    |
| C4  | 19(1)    | 34(2)    | 26(1)    | 1(1)     | 8(1)     | -4(1)    |
| C5  | 20(1)    | 33(1)    | 23(1)    | -8(1)    | 4(1)     | -1(1)    |
| C6  | 22(1)    | 21(1)    | 30(1)    | 0(1)     | 3(1)     | 4(1)     |
| C7  | 20(1)    | 28(1)    | 19(1)    | 5(1)     | 3(1)     | 1(1)     |
| C8  | 21(1)    | 25(1)    | 21(1)    | 4(1)     | 6(1)     | 0(1)     |
| O2  | 32(1)    | 26(1)    | 41(1)    | 5(1)     | 2(1)     | -10(1)   |
| C9  | 21(1)    | 36(2)    | 26(1)    | -7(1)    | -4(1)    | 5(1)     |
| C10 | 27(1)    | 33(2)    | 29(1)    | 2(1)     | -1(1)    | 11(1)    |
| C11 | 21(1)    | 47(2)    | 44(2)    | -11(2)   | -3(1)    | 11(1)    |
| N2  | 15(1)    | 31(1)    | 13(1)    | -2(1)    | -1(1)    | 2(1)     |
| C12 | 19(1)    | 30(1)    | 20(1)    | -1(1)    | 4(1)     | -1(1)    |
| O3  | 27(1)    | 63(1)    | 17(1)    | -5(1)    | 3(1)     | 11(1)    |
| C13 | 16(1)    | 31(1)    | 20(1)    | 1(1)     | 3(1)     | 1(1)     |
| C14 | 22(1)    | 42(2)    | 20(1)    | -1(1)    | 4(1)     | 10(1)    |
| C15 | 26(1)    | 41(2)    | 17(1)    | 0(1)     | 4(1)     | 5(1)     |
| C16 | 18(1)    | 31(1)    | 21(1)    | 4(1)     | -2(1)    | 3(1)     |
| Br1 | 30(1)    | 51(1)    | 26(1)    | 4(1)     | -5(1)    | 16(1)    |
| C17 | 26(2)    | 67(2)    | 31(2)    | -7(2)    | 4(1)     | 20(2)    |
| C18 | 26(2)    | 66(2)    | 24(1)    | -9(1)    | 5(1)     | 15(1)    |
| O4  | 30(1)    | 34(1)    | 18(1)    | 2(1)     | 2(1)     | -9(1)    |

Table 5. Hydrogen coordinates ( $\times 10^4$ ) and isotropic displacement parameters ( $\text{\AA}^2 \times 10^{-3}$ ) for compound **13**.

|      | x        | y        | z       | U(eq) |
|------|----------|----------|---------|-------|
| H2A  | 7070     | 3994     | -521    | 25    |
| H3A  | 6442     | 3204     | 357     | 29    |
| H4A  | 6502     | 4241     | 2095    | 32    |
| H5A  | 6700     | 6373     | 2229    | 31    |
| H6A  | 6805     | 7368     | 610     | 31    |
| H7A  | 7219     | 6030     | -459    | 28    |
| H9A  | 6052     | 4415     | -1404   | 37    |
| H10A | 6235     | 6614     | -1258   | 39    |
| H11A | 5417     | 5854     | -1122   | 49    |
| H11B | 5694     | 5713     | 287     | 49    |
| H2B  | 8320     | 4749     | 3315    | 25    |
| H14A | 8925     | 4538     | 4709    | 34    |
| H15A | 9670     | 4130     | 6292    | 34    |
| H17A | 10329    | 2309     | 4281    | 52    |
| H18A | 9587     | 2746     | 2699    | 48    |
| H4B  | 7072(12) | 1300(20) | 890(30) | 35    |
| H4C  | 6728(11) | 890(30)  | 0(20)   | 35    |

Table 6. Torsion angles [°] for compound **13**.

|              |           |                 |           |
|--------------|-----------|-----------------|-----------|
| N2-N1-C1-O1  | -1.1(4)   | C2-C3-C9-C11    | -129.7(3) |
| C8-N1-C1-O1  | -178.8(2) | C4-C3-C9-C10    | 50.5(3)   |
| N2-N1-C1-C2  | 178.6(2)  | C2-C3-C9-C10    | -63.4(3)  |
| C8-N1-C1-C2  | 0.9(3)    | C3-C9-C10-C11   | -115.3(3) |
| O1-C1-C2-C7  | 176.6(3)  | C11-C9-C10-C6   | 116.8(3)  |
| N1-C1-C2-C7  | -3.1(3)   | C3-C9-C10-C6    | 1.5(3)    |
| O1-C1-C2-C3  | 57.6(3)   | C5-C6-C10-C11   | 14.2(4)   |
| N1-C1-C2-C3  | -122.1(2) | C7-C6-C10-C11   | 129.2(3)  |
| C1-C2-C3-C4  | 59.4(3)   | C5-C6-C10-C9    | -52.6(3)  |
| C7-C2-C3-C4  | -56.6(3)  | C7-C6-C10-C9    | 62.3(3)   |
| C1-C2-C3-C9  | 176.8(2)  | C6-C10-C11-C9   | -96.4(3)  |
| C7-C2-C3-C9  | 60.8(2)   | C3-C9-C11-C10   | 96.6(3)   |
| C9-C3-C4-C5  | -54.2(3)  | C1-N1-N2-C12    | 75.4(3)   |
| C2-C3-C4-C5  | 58.0(3)   | C8-N1-N2-C12    | -107.1(3) |
| C3-C4-C5-C6  | 0.7(3)    | N1-N2-C12-O3    | 1.1(4)    |
| C4-C5-C6-C10 | 53.5(3)   | N1-N2-C12-C13   | -177.2(2) |
| C4-C5-C6-C7  | -58.8(3)  | O3-C12-C13-C18  | -3.3(4)   |
| C1-C2-C7-C8  | 4.1(3)    | N2-C12-C13-C18  | 175.1(3)  |
| C3-C2-C7-C8  | 124.0(2)  | O3-C12-C13-C14  | 177.0(3)  |
| C1-C2-C7-C6  | -117.9(2) | N2-C12-C13-C14  | -4.7(4)   |
| C3-C2-C7-C6  | 2.1(3)    | C18-C13-C14-C15 | 1.4(4)    |
| C5-C6-C7-C8  | -63.5(3)  | C12-C13-C14-C15 | -178.9(3) |
| C10-C6-C7-C8 | 179.3(2)  | C13-C14-C15-C16 | -0.2(4)   |
| C5-C6-C7-C2  | 53.8(3)   | C14-C15-C16-C17 | -1.5(5)   |
| C10-C6-C7-C2 | -63.4(2)  | C14-C15-C16-Br1 | 179.1(2)  |
| N2-N1-C8-O2  | 3.3(4)    | C15-C16-C17-C18 | 1.9(5)    |
| C1-N1-C8-O2  | -179.0(3) | Br1-C16-C17-C18 | -178.7(3) |
| N2-N1-C8-C7  | -175.9(2) | C14-C13-C18-C17 | -0.9(5)   |
| C1-N1-C8-C7  | 1.8(3)    | C12-C13-C18-C17 | 179.3(3)  |
| C2-C7-C8-O2  | 177.2(3)  | C16-C17-C18-C13 | -0.7(5)   |
| C6-C7-C8-O2  | -63.7(4)  |                 |           |
| C2-C7-C8-N1  | -3.6(3)   |                 |           |
| C6-C7-C8-N1  | 115.5(2)  |                 |           |
| C4-C3-C9-C11 | -15.7(4)  |                 |           |

---

Symmetry transformations used to generate equivalent atoms:

Table 7. Hydrogen bonds for compound **13** [ $\text{\AA}$  and  $^\circ$ ].

---

| D-H...A       | d(D-H)  | d(H...A) | d(D...A) | <(DHA) |
|---------------|---------|----------|----------|--------|
| N2-H2B...O4#1 | 0.88    | 1.91     | 2.735(3) | 154.5  |
| O4-H4B...O1   | 0.80(2) | 2.00(2)  | 2.799(3) | 172(3) |
| O4-H4C...O3#2 | 0.80(2) | 1.97(2)  | 2.772(3) | 178(3) |

---

Symmetry transformations used to generate equivalent atoms:

#1  $-x+3/2, y+1/2, -z+1/2$  #2  $-x+3/2, -y+1/2, -z$

Unit cell for compound 13.

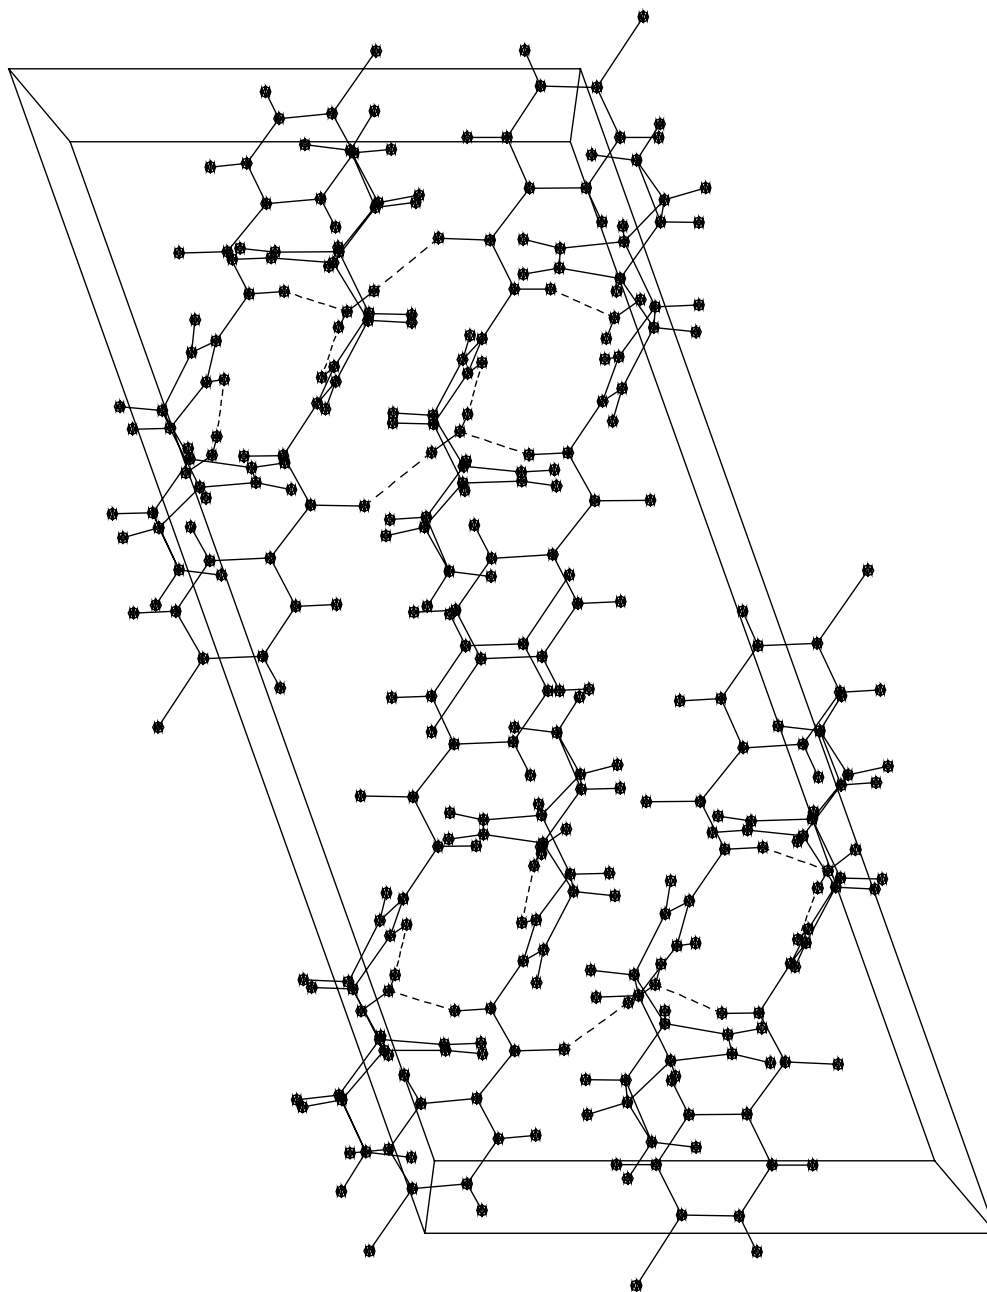

Supplement: NIHMS61998-supplement-si20070204_060.pdf [file NIHMS61998-supplement-si20070204_060.pdf]
